# Supplementary material for: Polymorphism and luminescence properties of heteropolynuclear metal–organic frameworks containing oxydiacetate as linker
Source: Royal Society of Chemistry journal article supplement (doi:10.1039/c8ce01074a), 2018-01-01
Supplement: c8ce01074a1.pdf [file c8ce01074a1.pdf]

**Polymorphism and luminescent properties of heteropolynuclear metal organic frameworks containing oxydiacetate as linker**

**Fernando Igoa, Sebastián Martínez, Kassio P. S. Zanoni, Jorge Castiglioni, Leopoldo Suescun, Javier González-Platas, Andrea S. S. de Camargo, Carlos Kremer, Julia Torres**

**Supporting Information**

CIE Calculation

The x and y CIE coordinates were calculated by Equations S1a and S1b from their X, Y and Z tristimulus, from Equations S2a to S2c, using photoluminescence spectral data in acetonitrile at 298 K. The numerical values of the CIE standard  $\bar{x}(\lambda)$ ,  $\bar{y}(\lambda)$  and  $\bar{z}(\lambda)$ , are available as online free-access tables<sup>1</sup>.

$$x = \frac{X}{X+Y+Z} \quad (\text{Eq. S1a})$$

$$y = \frac{Y}{X+Y+Z} \quad (\text{Eq. S1b})$$

$$X = \int_{380}^{780} I(\lambda) \bar{x}(\lambda) d\lambda \quad (\text{Eq. S2a})$$

$$Y = \int_{380}^{780} I(\lambda) \bar{y}(\lambda) d\lambda \quad (\text{Eq. S2b})$$

$$Z = \int_{380}^{780} I(\lambda) \bar{z}(\lambda) d\lambda \quad (\text{Eq. S2c})$$

### Supplementary figures

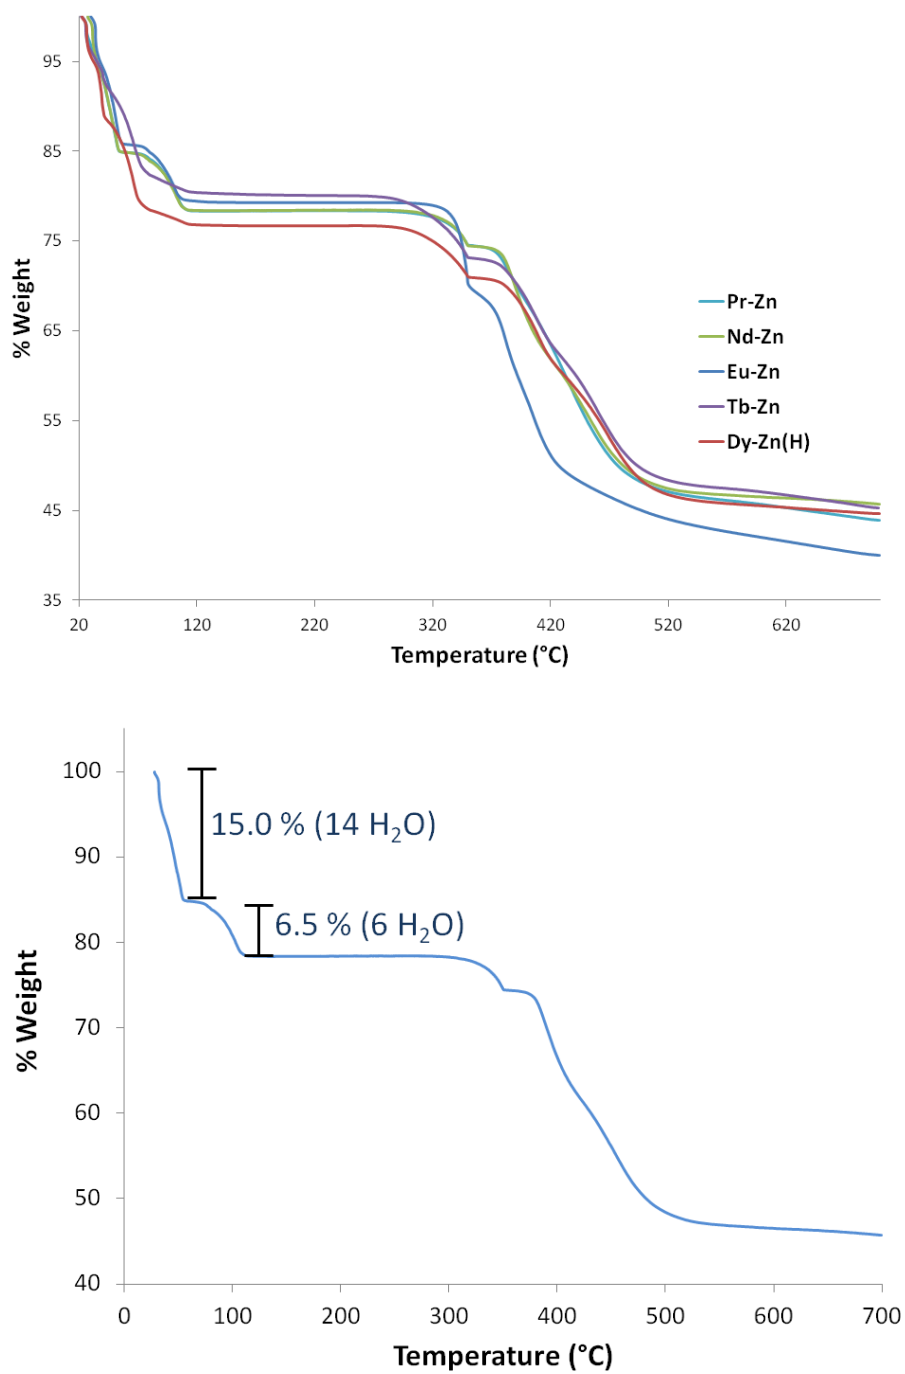

Figure S1. TGA curves for the **Ln-Zn**MOFs belonging to the hexagonal P6/mcc space group. In detail the corresponding profile for [Nd<sub>2</sub>Zn<sub>3</sub>(oda)<sub>6</sub>(H<sub>2</sub>O)<sub>6</sub>]·14H<sub>2</sub>O

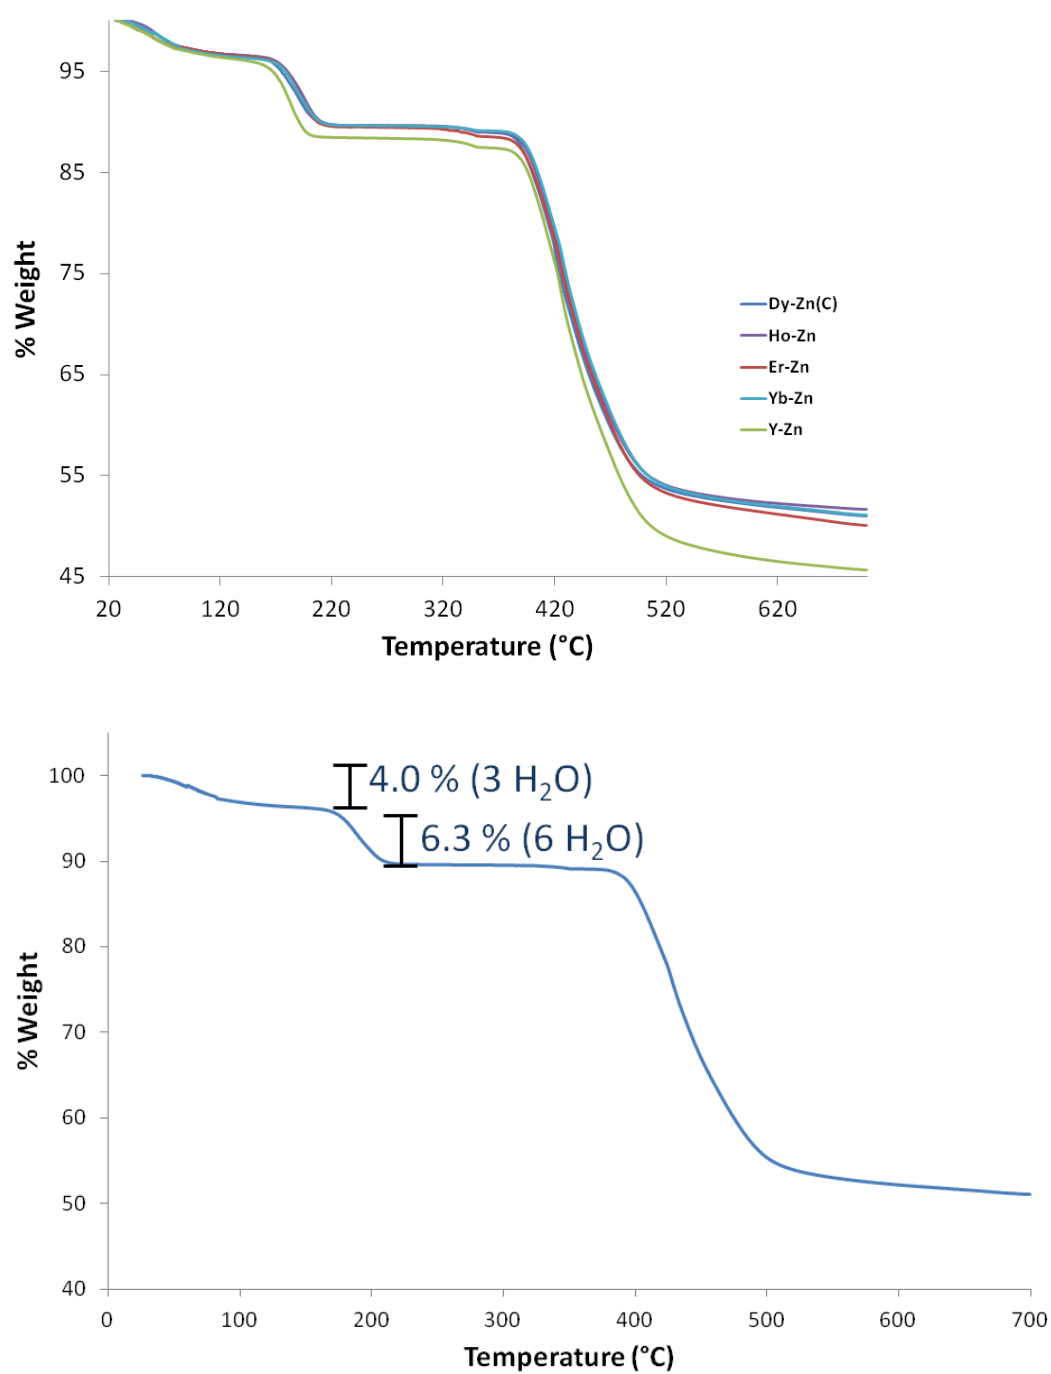

Figure S2. TGA curves for the **Ln-Zn** MOFs belonging to the cubic  $\text{Fd}\bar{3}\text{c}$  space group. In detail the corresponding profile for  $[\text{Zn}(\text{H}_2\text{O})_6]\{\text{ZnYb}(\text{oda})_3\}_2 \cdot 3\text{H}_2\text{O}$

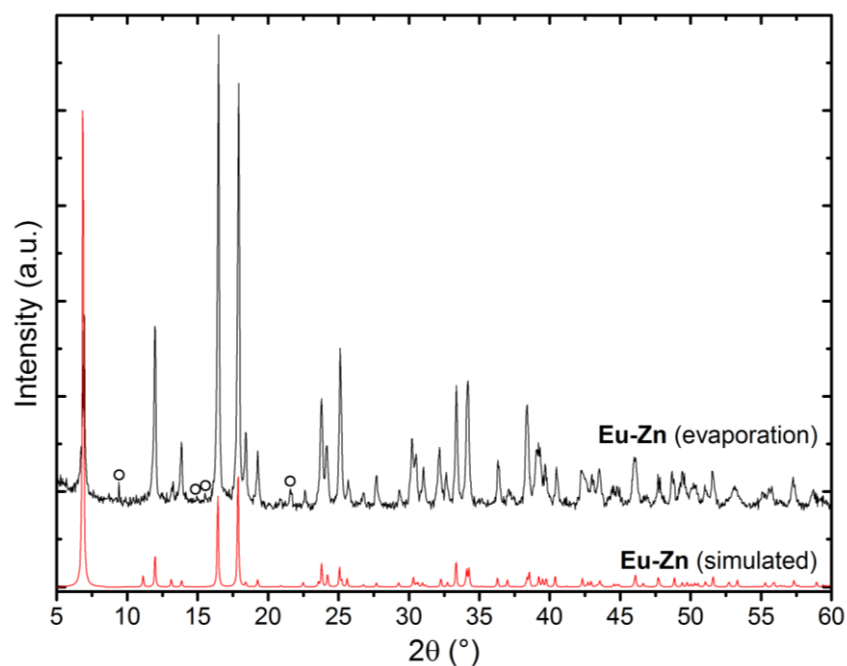

Figure S3. Powder diffraction pattern for **Eu-Zn** obtained by evaporation of the aqueous solution (black), and simulated from the adjusted structure (red). Impurity peaks are highlighted with a circle.

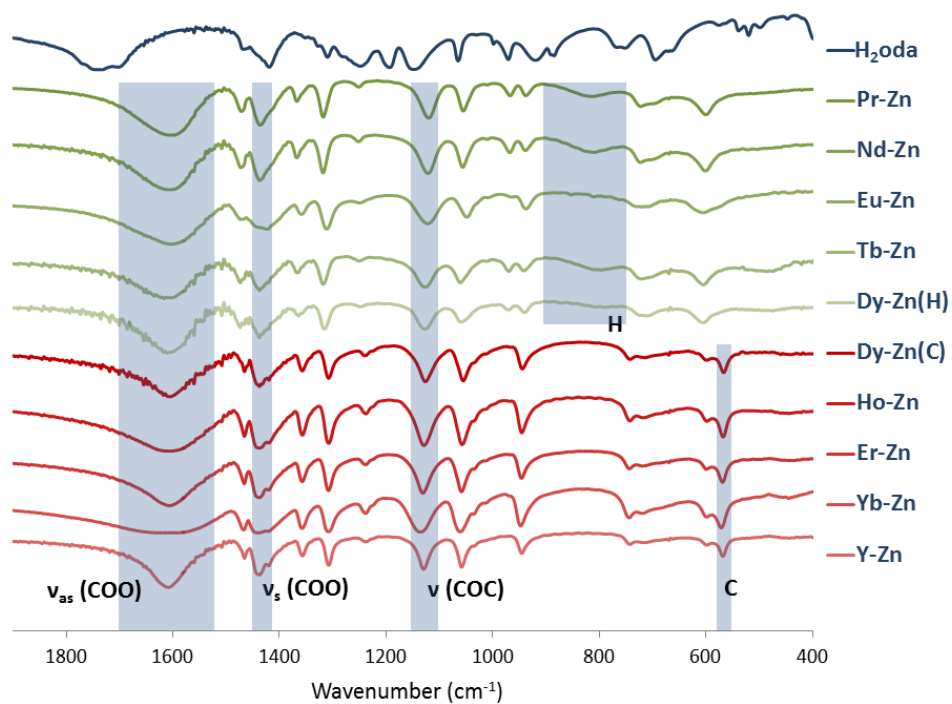

Figure S4. IR spectra for  $\text{H}_2\text{oda}$  and for the obtained **Ln-Zn** MOFs. Main band assignments are indicated as well as some characteristic bands that are identified for hexagonal (H) or cubic (C) forms.

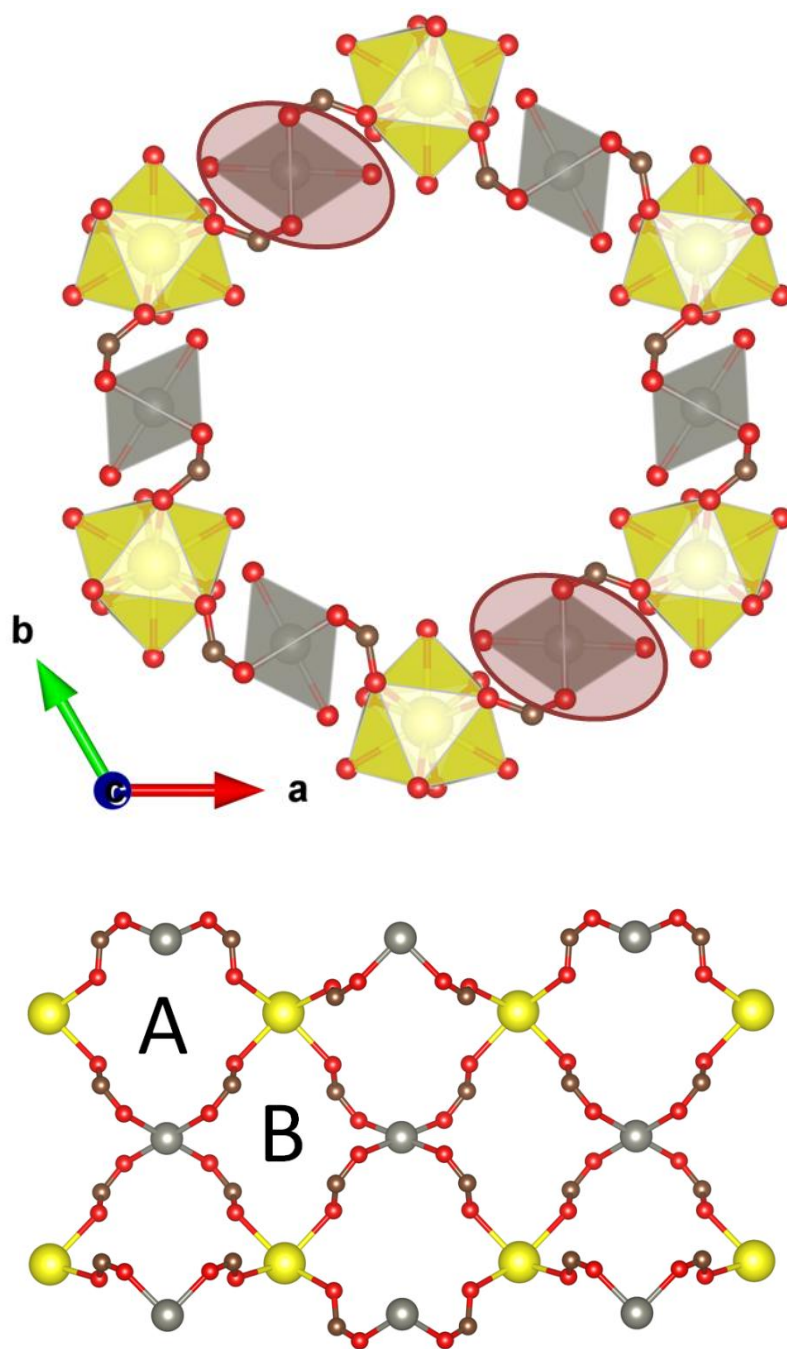

Figure S5.  $\text{Ln}_2\text{Zn}_2(\text{COO})_4$  and  $\text{Ln}_6\text{Zn}_6(\text{COO})_{12}$  SBUs in **Nd-Zn**.

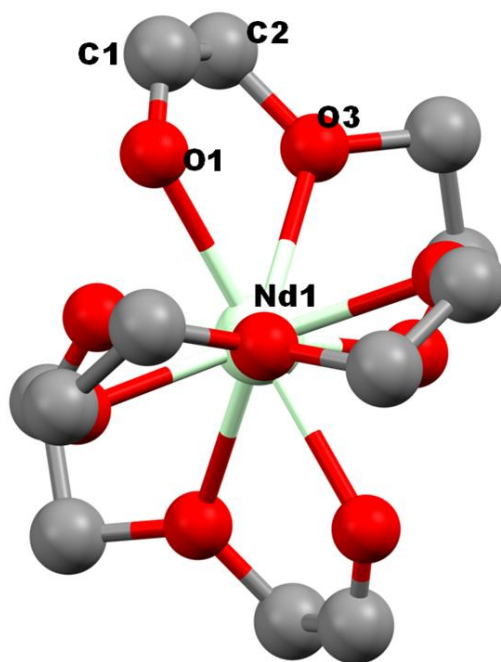

Figure S6. Connectivity around Nd for **Nd-Cd**.

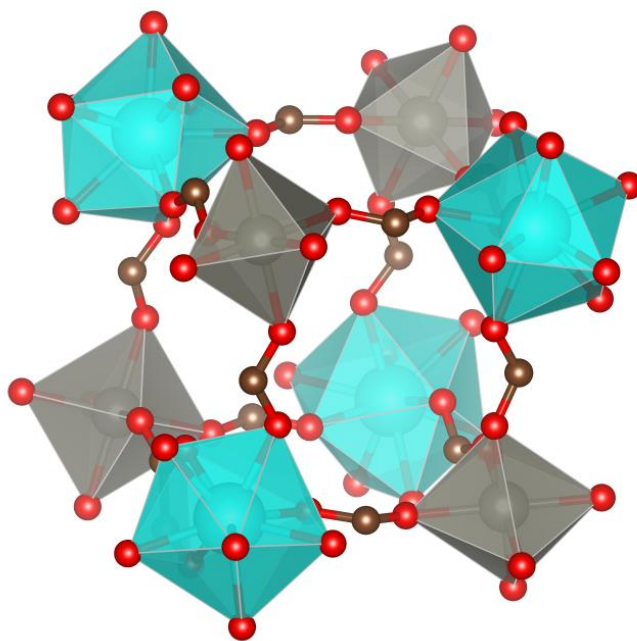

Figure S7. **Yb-Zn** secondary building unit.

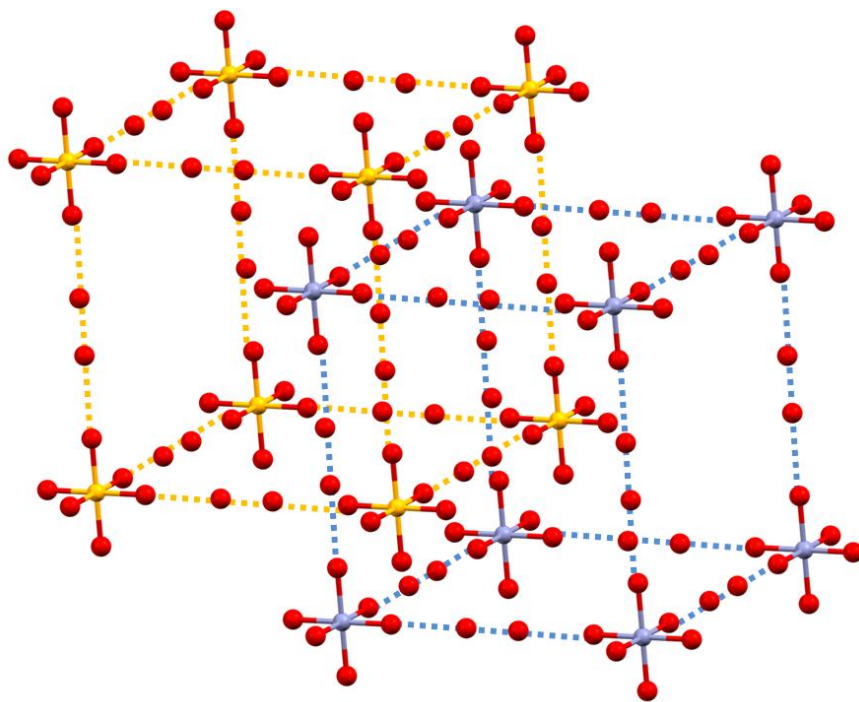

Figure S8.  $[\text{Zn}(\text{H}_2\text{O})]^{2+}$  interpenetrated structure in the **Yb-Zn** MOF.

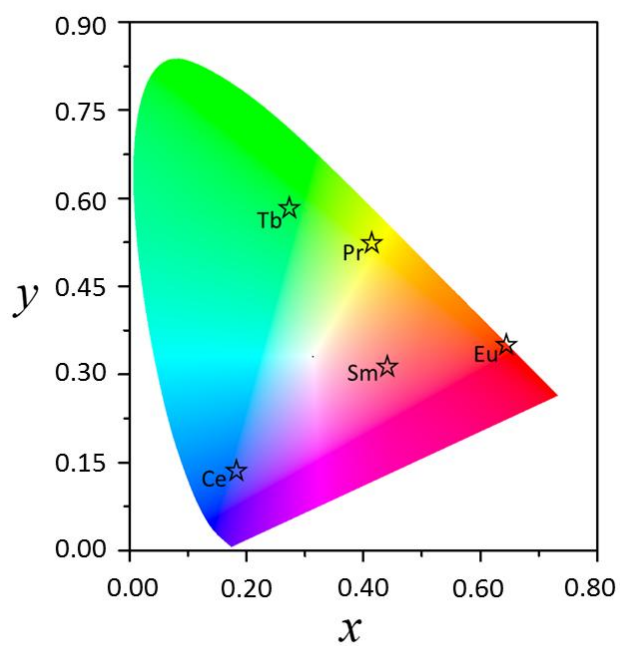

Figure S9. Color space chromaticity diagram with CIE coordinates for the emission of visible emitting Ln-Zn complexes at 298 K.

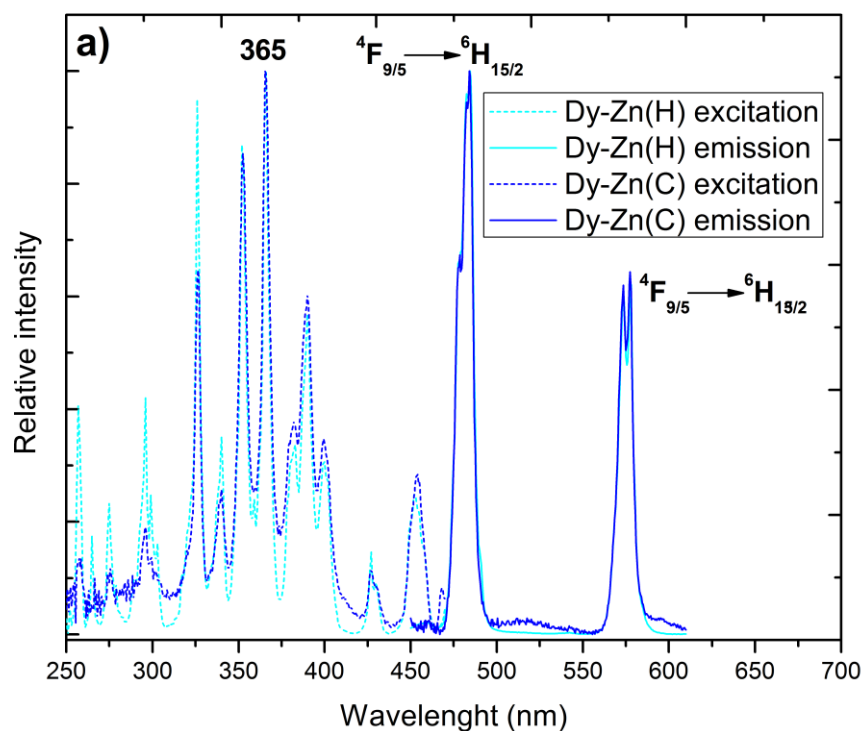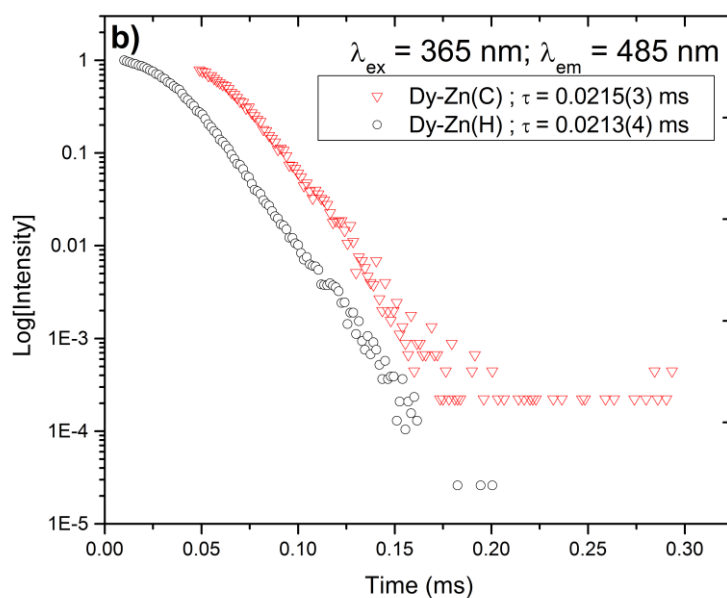

Figure S10. **Dy-Zn(H)** and **Dy-Zn(C)** luminescence studies. Excitation at 365nm. a)Emission spectra (continuous line) and the corresponding excitation spectra (dashed line). Time decay ( $\tau$ ) of **Dy-Zn(H)** and **Dy-Zn(C)** by monitoring the 485 nm emission;  $\tau$  was determined by fitting a single exponential decay function of the form  $I = I_0 e^{-\frac{t}{\tau}}$  in both cases.

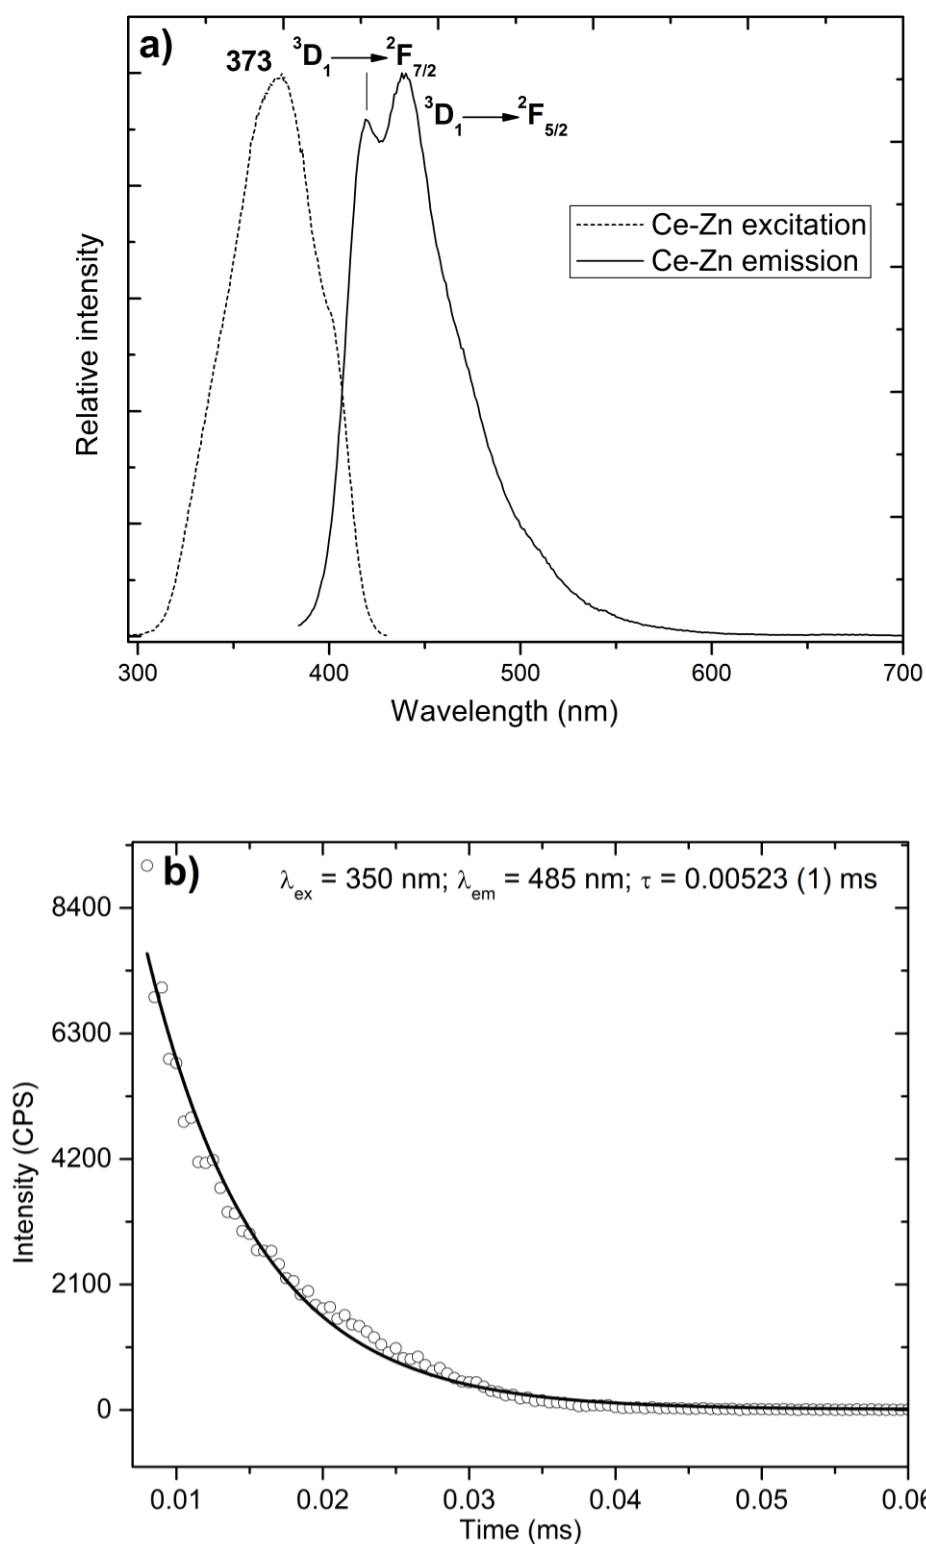

Figure S11. **Ce-Zn** luminescence studies. Excitation at 373 nm. a) Emission spectra (continuous line) and the corresponding excitation spectra (dashed line). b) Time decay ( $\tau$ ) monitoring the 485 nm emission;  $\tau$  was determined by fitting a single exponential decay function of the form

$$I = I_0 e^{-\frac{t}{\tau}}.$$

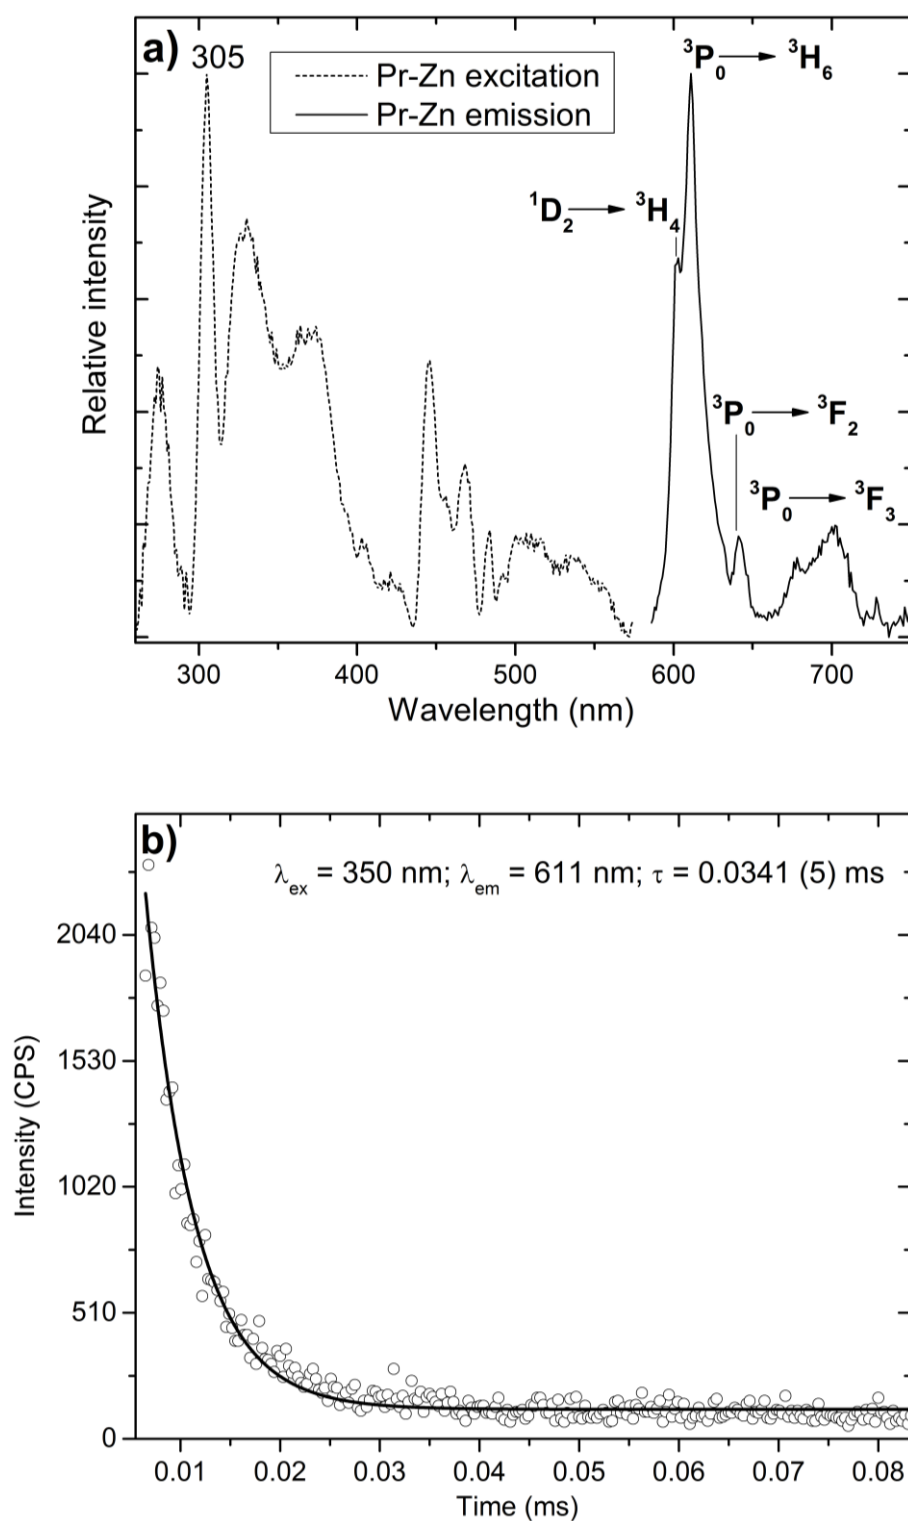

Figure S12. **Pr-Zn** luminescence studies. Excitation at 345 nm. a) Emission spectra (continuous line) and the corresponding excitation spectra (dashed line). b) Time decay ( $\tau$ ) monitoring the 611 nm emission;  $\tau$  was determined by fitting a single exponential decay function of the form

$$I = I_0 e^{-\frac{t}{\tau}}.$$

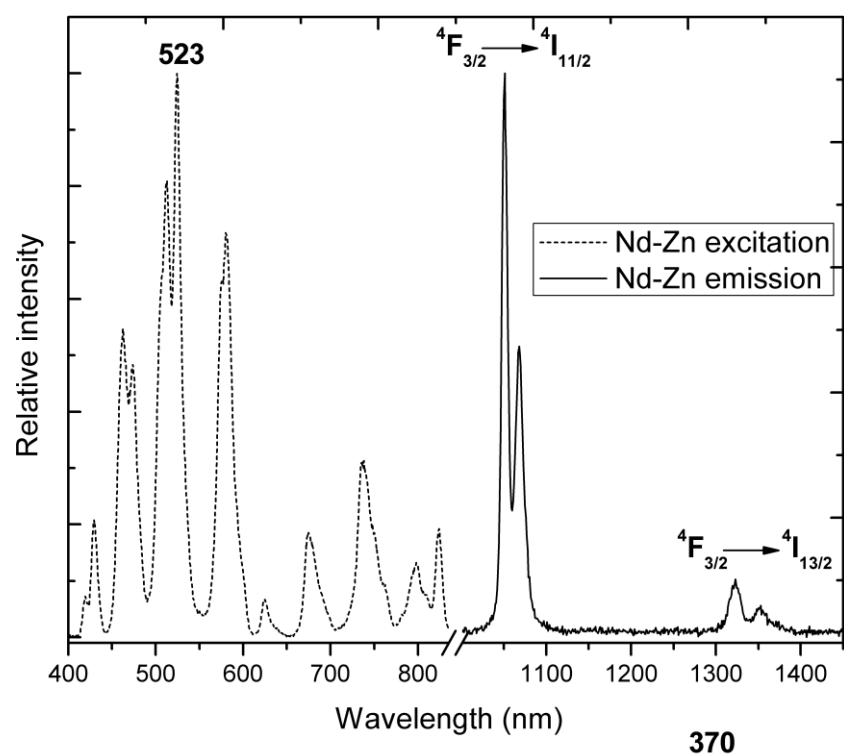

Figure S13. **Nd-Zn** luminescence studies. Excitation at 523 nm. Emission spectra (continuous line) and the corresponding excitation spectra (dashed line).

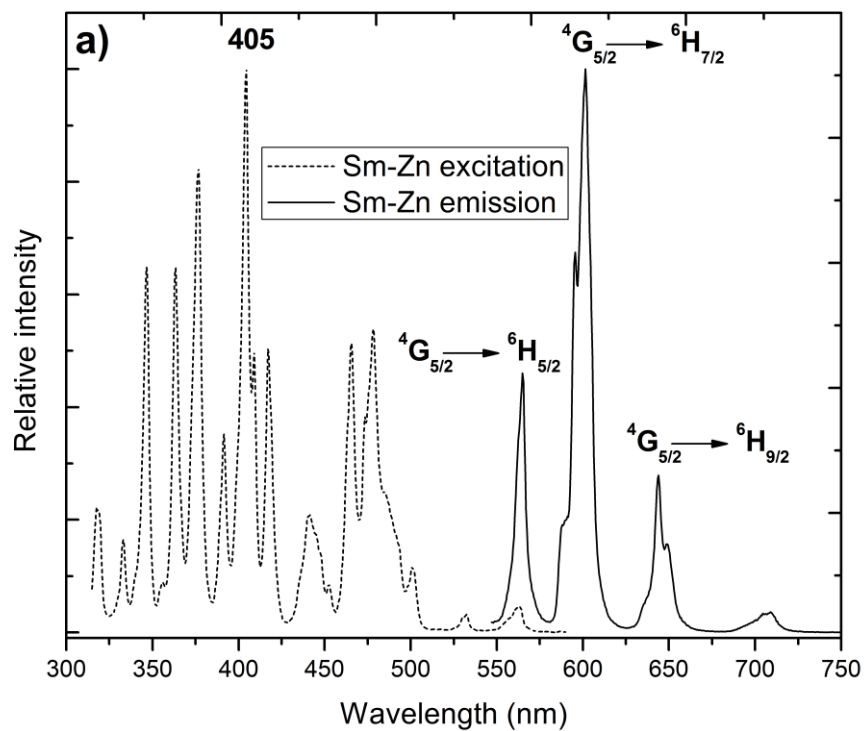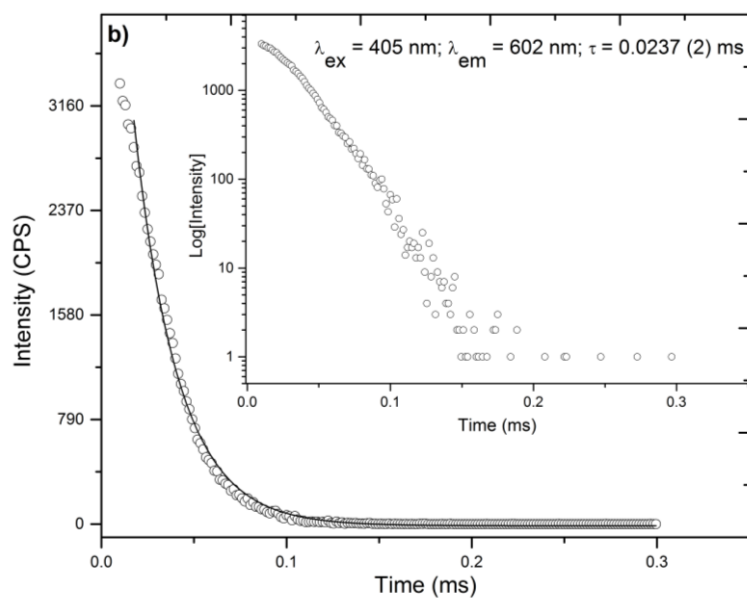

Figure S14. **Sm-Zn** luminescence studies. Excitation at 405 nm. a) Emission spectra (continuous line) and the corresponding excitation spectra (dashed line). b) Time decay ( $\tau$ ) monitoring the 602 nm emission;  $\tau$  was determined by fitting a single exponential decay function of the form

$$I = I_0 e^{-\frac{t}{\tau}}.$$

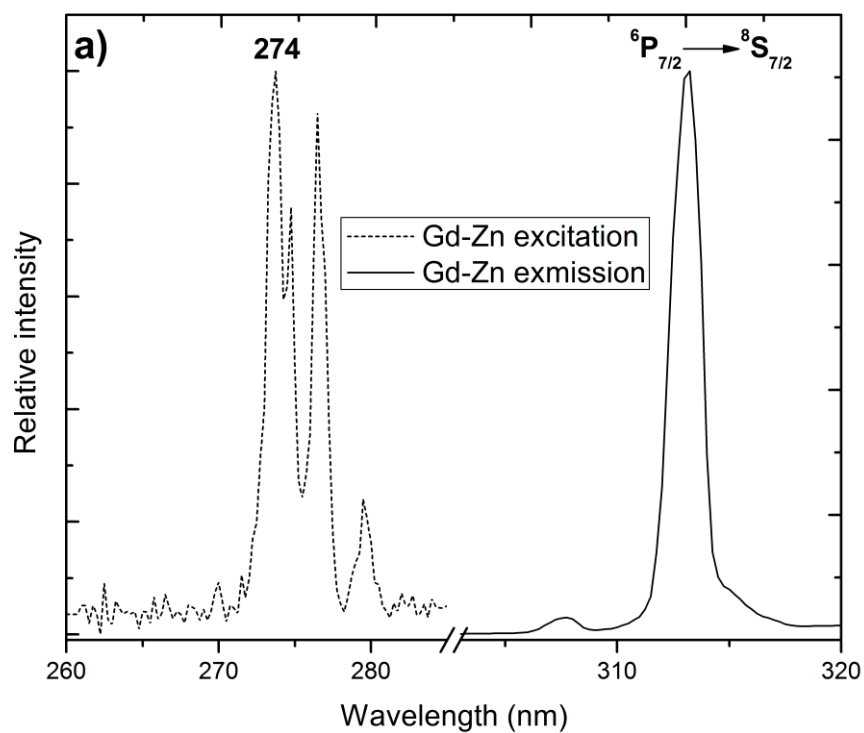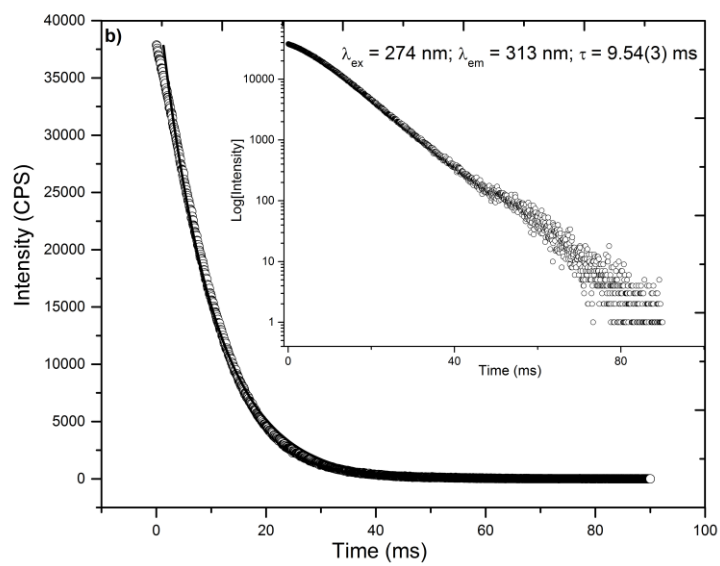

Figure S15. **Gd-Zn** luminescence studies. Excitation at 274 nm. a) Emission spectra (continuous line) and the corresponding excitation spectra (dashed line). b) Time decay ( $\tau$ ) when monitoring the 313 nm emission;  $\tau$  was determined by fitting a single exponential decay function of the form  $I = I_0 e^{-\frac{t}{\tau}}$ .

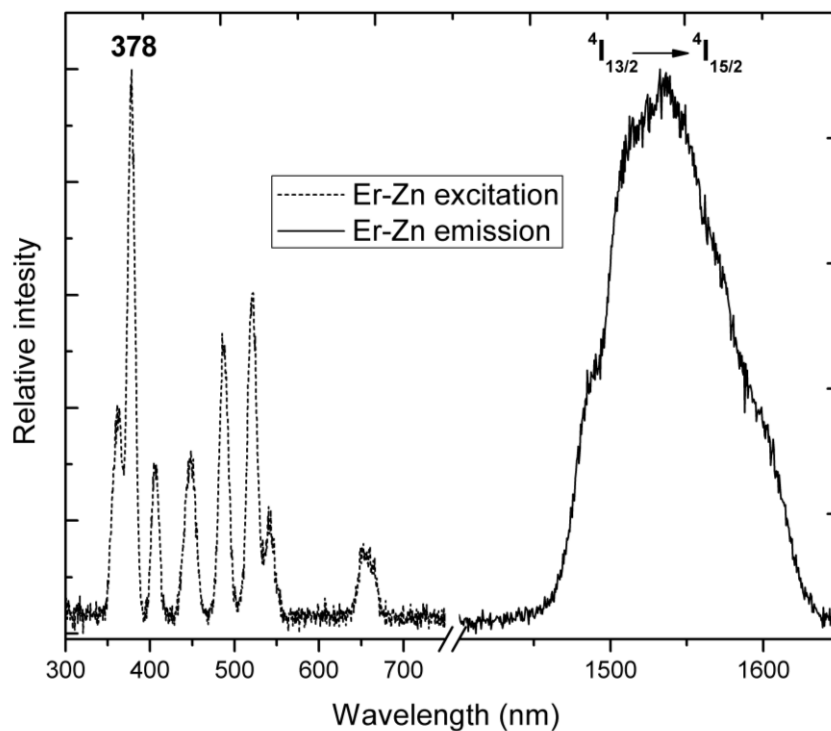

Figure S16. **Er-Zn** emission spectra excited with a 378 nm light (continuous line) and excitation spectra when monitoring the 1535 nm emission (dashed line).

## Supplementary tables

Table S1. Continuous Shape Measure (CSHM) calculations for all new Ln-Zn synthesized compounds<sup>2</sup>.

| Ideal structure                    | Pr-Zn       | Nd-Zn       | Eu-Zn       | Tb-Zn       | Dy-Zn(H)    | Dy-Zn(C)    | Ho-Zn       | Er-Zn       | Yb-Zn       | Y-Zn        |
|------------------------------------|-------------|-------------|-------------|-------------|-------------|-------------|-------------|-------------|-------------|-------------|
| Enneagon                           | 31.75       | 32.46       | 34.09       | 33.95       | 34.57       | 34.32       | 34.30       | 34.36       | 34.39       | 34.31       |
| Octagonal pyramid                  | 25.11       | 24.74       | 24.00       | 24.06       | 23.76       | 23.92       | 23.91       | 23.87       | 23.83       | 23.92       |
| Heptagonal bipyramid               | 17.61       | 17.84       | 18.43       | 18.46       | 18.69       | 18.96       | 19.04       | 19.10       | 19.24       | 18.95       |
| Johnson triangular cupola          | 12.89       | 13.16       | 13.81       | 13.74       | 13.99       | 13.98       | 14.01       | 14.05       | 14.12       | 13.97       |
| Capped cube                        | 9.56        | 9.62        | 9.84        | 9.84        | 9.92        | 10.09       | 10.13       | 10.16       | 10.22       | 10.08       |
| Spherical-relaxed capped cube      | 8.44        | 8.49        | 8.65        | 8.67        | 8.74        | 8.92        | 8.97        | 8.99        | 9.07        | 8.91        |
| Capped square antiprism            | 3.04        | 2.92        | 2.68        | 2.64        | 2.56        | 2.42        | 2.39        | 2.37        | 2.32        | 2.42        |
| Spherical capped square antiprism  | 2.15        | 2.02        | 1.72        | 1.71        | 1.63        | 1.46        | 1.43        | 1.41        | 1.36        | 1.47        |
| Tricapped trigonal prism           | 2.18        | 2.14        | 2.10        | 2.01        | 1.99        | 1.80        | 1.76        | 1.75        | 1.69        | 1.80        |
| Spherical tricapped trigonal prism | <b>1.80</b> | <b>1.61</b> | <b>1.19</b> | <b>1.19</b> | <b>1.06</b> | <b>0.95</b> | <b>0.92</b> | <b>0.90</b> | <b>0.85</b> | <b>0.96</b> |
| Tridiminished icosahedron          | 11.06       | 10.90       | 10.75       | 10.88       | 10.78       | 11.48       | 11.58       | 1.61        | 11.74       | 11.46       |
| Hula-hoop                          | 12.45       | 12.51       | 12.63       | 12.59       | 12.67       | 12.52       | 12.51       | 12.52       | 12.52       | 12.52       |
| Muffin                             | 2.71        | 2.60        | 2.34        | 2.33        | 2.26        | 2.11        | 2.09        | 2.07        | 2.04        | 2.12        |

\*The CShM parameter is defined as a distance between the real and the ideal polyhedral.

Table S2 Excited state lifetimes for Eu-Zn.

|             | Ce-Zn      | Pr-Zn     | Sm-Zn     | Eu-Zn    | Gd-Zn   | Tb-Zn   | Dy-Zn(H)  | Dy-Zn(C)  |
|-------------|------------|-----------|-----------|----------|---------|---------|-----------|-----------|
| $\tau$ (ms) | 0.00523(1) | 0.0341(5) | 0.0237(2) | 2.141(7) | 9.54(3) | 3.79(2) | 0.0213(4) | 0.0215(3) |

## References

- 1 CIE-Datatables, [http://www.cie.co.at/publ/abst/datatables15\\_2004/z2.txt](http://www.cie.co.at/publ/abst/datatables15_2004/z2.txt);  
[http://www.cie.co.at/publ/abst/datatables15\\_2004/x2.txt](http://www.cie.co.at/publ/abst/datatables15_2004/x2.txt);  
[http://www.cie.co.at/publ/abst/datatables15\\_2004/y2.txt](http://www.cie.co.at/publ/abst/datatables15_2004/y2.txt).
- 2 P. Alemany, D. Casanova, S. Alvarez, C. Dryzun, M. Llunell and D. Avnir, *Rev. Comput. Chem.*
